# Supplementary material for: Self-assembly of colloidal sulfur particles on a glass surface from evaporating sessile drops: influence of different salts
Source: Royal Society of Chemistry journal article supplement (doi:10.1039/c4nj01267d), 2014-09-26
Supplement: c4nj01267d3.pdf [file c4nj01267d3.pdf]

## Supporting Information

### **Self-Assembly of Colloidal Sulfur Particles on Glass Surface from Evaporating Sessile Drops: Influence of Different Salts**

Santanu Paria,\* Rajib Ghosh Chaudhuri, and Naveen Noah Jason

Interfaces and Nanomaterials Laboratory, Department of Chemical Engineering, National Institute of Technology, Rourkela 769008, Orissa, India.

\*To whom correspondence should be addressed. E-mail: [santanuparia@yahoo.com](mailto:santanuparia@yahoo.com), or [sparia@nitrkl.ac.in](mailto:sparia@nitrkl.ac.in); Fax: +91 661 246 2999.

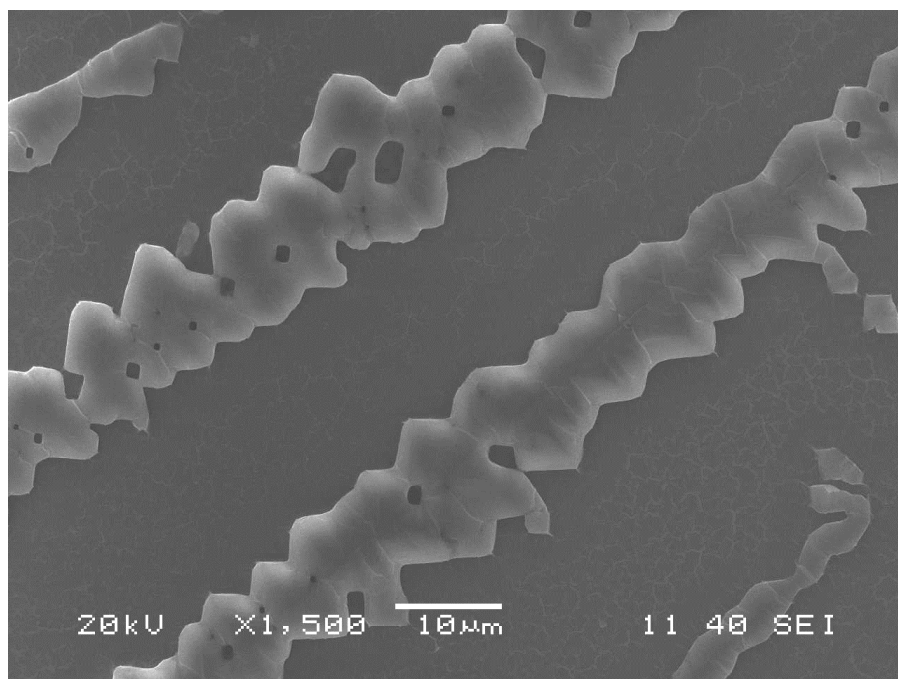

**Figure S1.** High resolution image of a branch in self-assembled patterns of sodium chloride and sulfur suspension at 10 mM concentration, forming parallel linear structures with uniform jagged edges on both sides. This is usually found near the periphery of the drop.

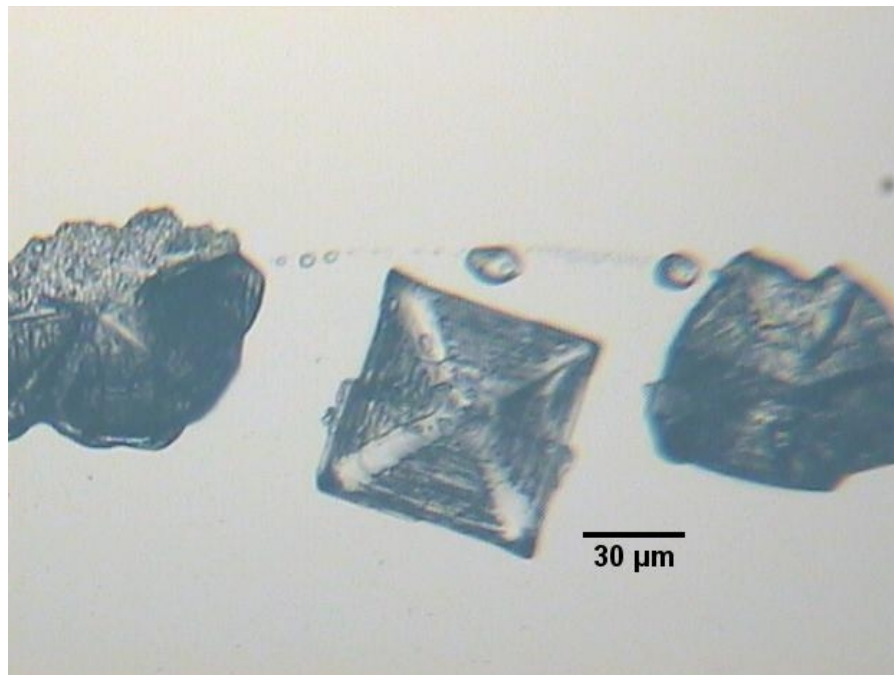

**Figure S2.** Salt morphology of NaCl at 10 mM concentration. Note the square pyramidal structure formed instead of the octahedral structure because of growth restriction in the XZ plane.

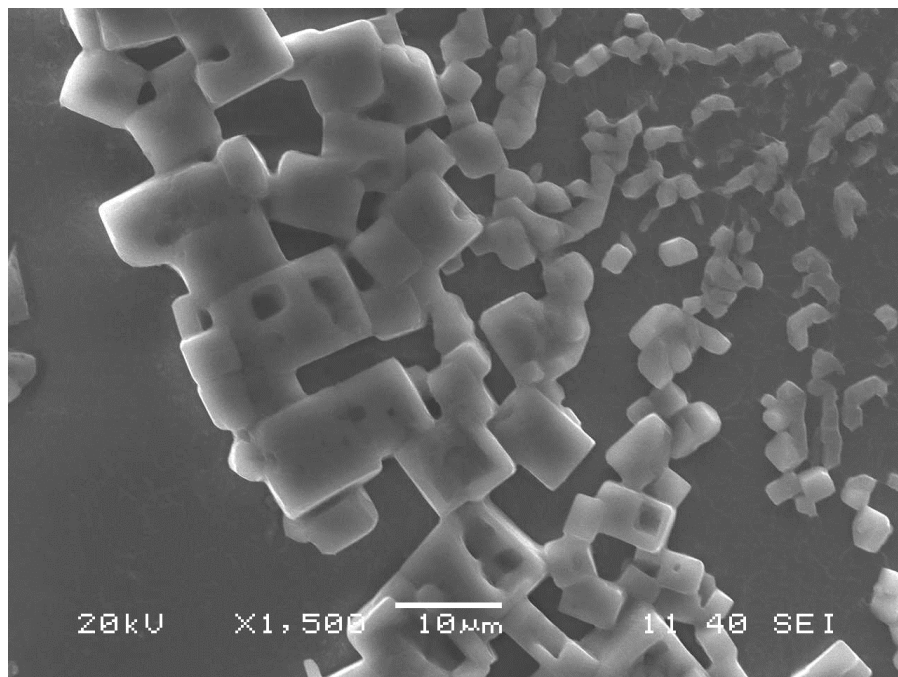

**Figure S3.** Salt crystal morphology of NaCl and sulfur suspension at 10 mM concentration.

Table: S1 Sulfur particles size in different acid media at different thiosulphate concentration.

| Acids                                                                         | Thioulphate Concentration |                  |                     |
|-------------------------------------------------------------------------------|---------------------------|------------------|---------------------|
|                                                                               | 1 mM                      | 10 mM            | 30 mM               |
| Hydrochloric acid (HCl)                                                       | 978.9 ± 21.1 nm           | 1321.3 ± 30.4 nm | <b>Not Measured</b> |
| Sulfuric acid (H <sub>2</sub> SO <sub>4</sub> )                               | 950.6 ± 12.3 nm           | 1251.8 ± 13.9 nm |                     |
| Oxalic acid (C <sub>2</sub> O <sub>4</sub> H <sub>2</sub> ·2H <sub>2</sub> O) | 450 ± 13.2 nm             | 770 ± 22.7 nm    |                     |

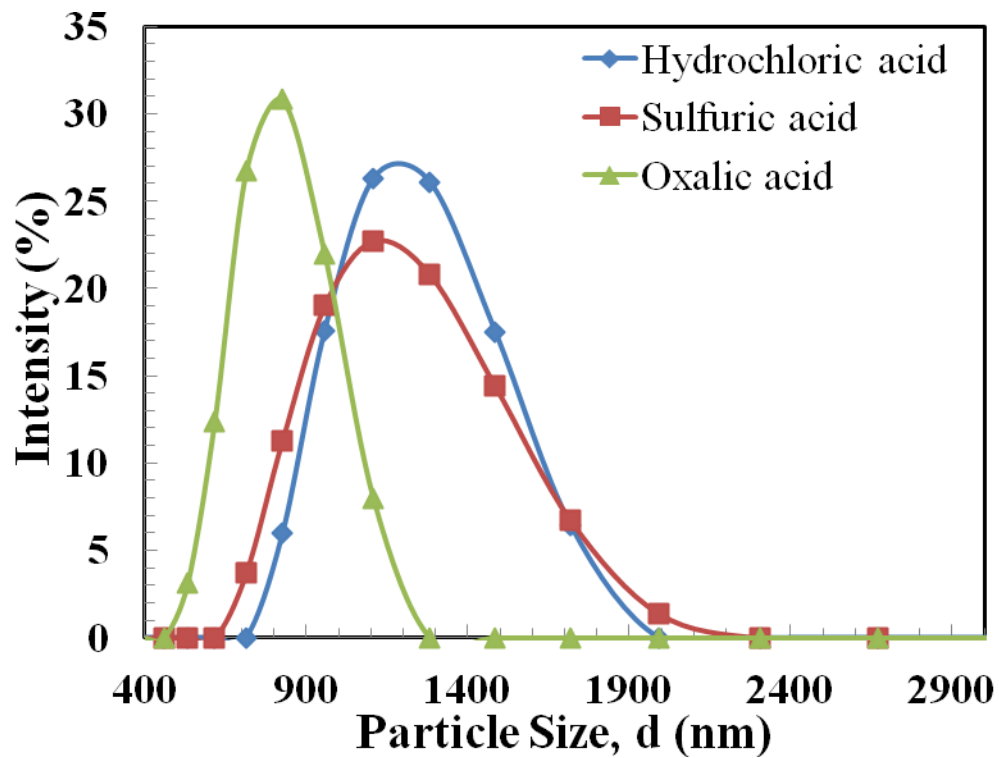

Figure 4: Particle size distribution of sulfur nanoparticles measured by DLS.
